# Supplementary material for: Pursuing shell-isolated nanoparticle-enhanced Raman spectroscopy (SHINERS) for concomitant detection of breast lesions and microcalcifications
Source: Royal Society of Chemistry journal article supplement (doi:10.1039/c5nr05319f), 2015-01-01
Supplement: c5nr05319f1.pdf [file c5nr05319f1.pdf]

## Electronic supplementary information

### **Pursuing shell-isolated nanoparticle-enhanced Raman spectroscopy (SHINERS) for concomitant detection of breast lesions and microcalcifications**

**Chao Zheng<sup>1,2†</sup>, Wanting Shao<sup>1†</sup>, Santosh Kumar Paidi<sup>2</sup>, Bing Han<sup>1</sup>, Tong Fu<sup>1</sup>, Di Wu<sup>1</sup>,  
Lirong Bi<sup>3</sup>, Weiqing Xu<sup>4</sup>, Zhimin Fan<sup>1\*</sup> and Ishan Barman<sup>2,5\*</sup>**

<sup>1</sup>Department of Breast Surgery, The First Hospital of Jilin University, Changchun 130021, China

<sup>2</sup>Department of Mechanical Engineering, Johns Hopkins University, Baltimore, Maryland 21218,  
USA

<sup>3</sup>Department of Pathology, The First Hospital of Jilin University, Changchun 130021, China

<sup>4</sup>State Key Laboratory for Supramolecular Structure and Materials, Jilin University, Changchun  
130012, China

<sup>5</sup>Department of Oncology, Johns Hopkins University, Baltimore, Maryland 21287, USA

†These authors contributed equally to this work.

\*Corresponding authors: [fanzhimn@163.com](mailto:fanzhimn@163.com) & [ibarman@jhu.edu](mailto:ibarman@jhu.edu)

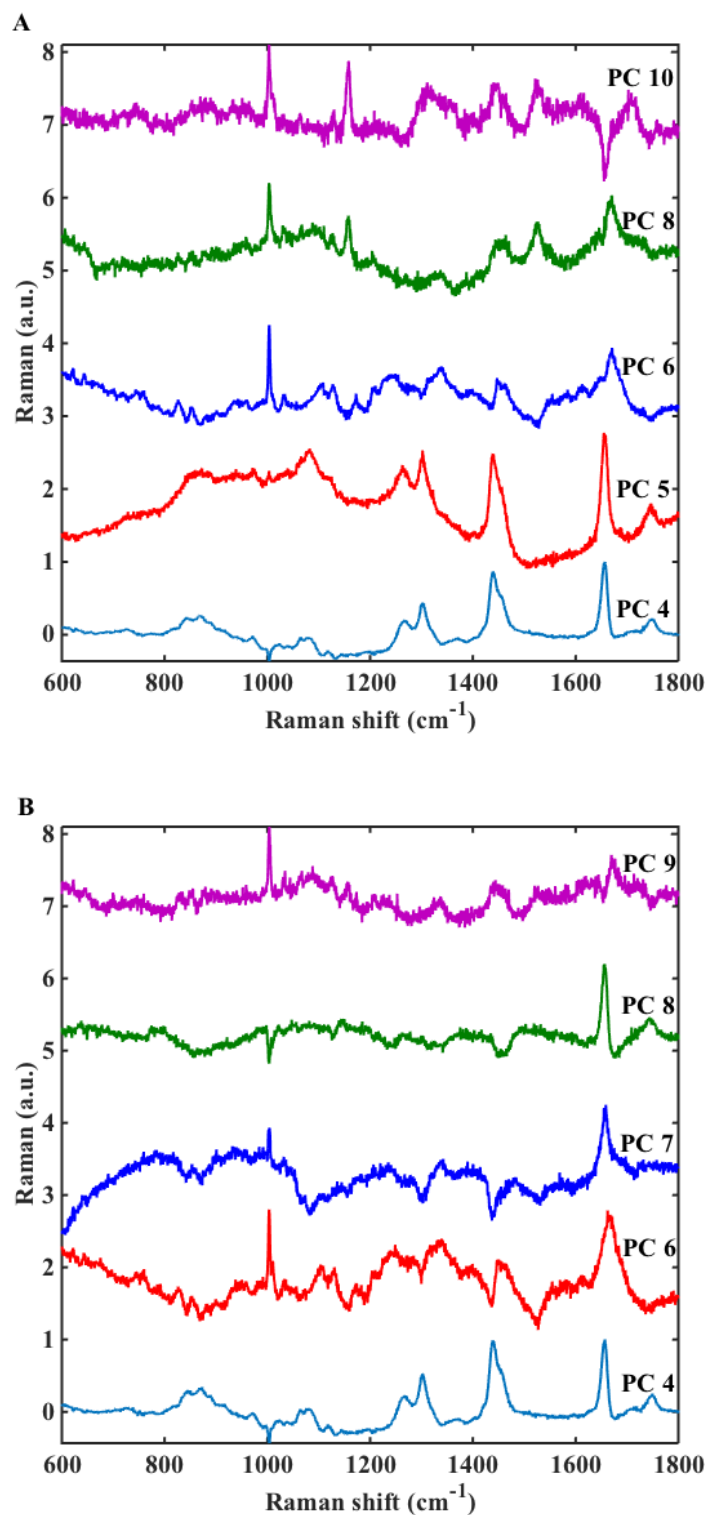

Fig. S1 The principal component loadings (PCs) used to draw radial visualization plots used in Fig. 4. (A) Spontaneous Raman spectra from tissues without microcalcifications; (B) SHINERS spectra from tissues without microcalcifications

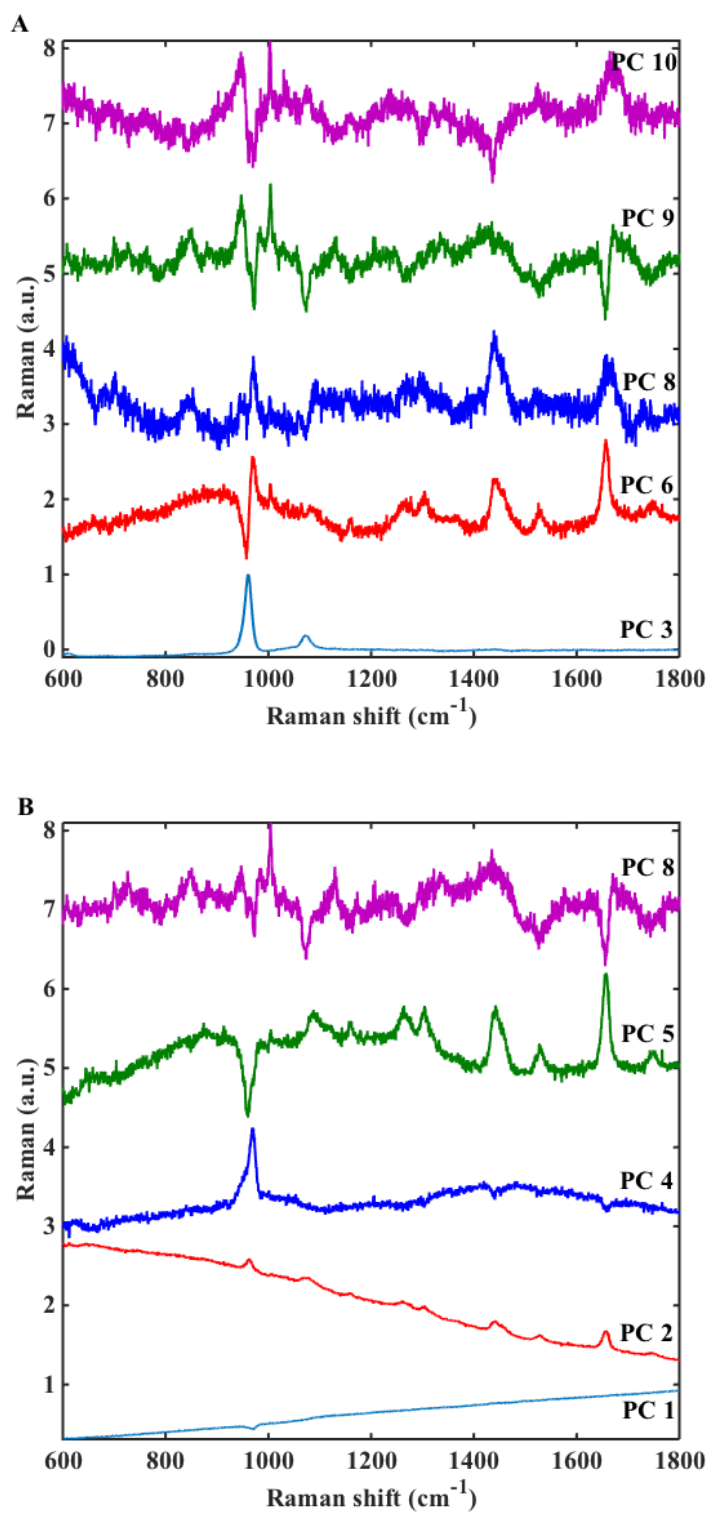

Fig. S2 The principal component loadings (PCs) used to draw radial visualization plots used in Fig. 6. (A) Spontaneous Raman Spectra from tissues exhibiting

microcalcifications; (B) SHINERS spectra from tissues exhibiting  
microcalcifications
